# Supplementary material for: Fluidity of Poly (ε-Caprolactone)-Based Material Induces Epithelial-to-Mesenchymal Transition
Source: PubMed Central journal article supplement (PMC7084864; doi:10.3390/ijms21051757), 2020-03-04
Supplement: ijms-21-01757-s001.pdf [file ijms-21-01757-s001.pdf]

## Supplementary Information

**Table S1.** Characterization of synthesized four-branched P(CL-*co*-DLLA) substrates

| CL/DLLA<br>unit per<br>branch | In feed |        | In copolymer <sup>a</sup> |        | Copolymer                   |                             |                             |                                             |
|-------------------------------|---------|--------|---------------------------|--------|-----------------------------|-----------------------------|-----------------------------|---------------------------------------------|
|                               | CL      | DLLA   | CL                        | DLLA   | M <sub>t</sub> <sup>b</sup> | M <sub>n</sub> <sup>c</sup> | M <sub>w</sub> <sup>c</sup> | M <sub>w</sub> /M <sub>n</sub> <sup>c</sup> |
|                               | (mol%)  | (mol%) | (mol%)                    | (mol%) |                             |                             |                             |                                             |
| 100                           | 60      | 40     | 61.1                      | 38.9   | 39100                       | 40900                       | 59600                       | 1.46                                        |
| 500                           | 60      | 40     | 59.9                      | 40.1   |                             | 50261                       | 119142                      | 2.37                                        |

<sup>a</sup> Determined by <sup>1</sup>H NMR (solvent: CDCl<sub>3</sub>).

<sup>b</sup> Theoretical molecular weight.

<sup>c</sup> Estimated by GPC (solvent: DMF, standard: PEG).

**Table S2.** Characterization of synthesized four-branched non-crosslinked P(CL-*co*-DLLA) substrates

| CL/DLL Unit per<br>branch | G' (kPa) | G'' (kPa) | Tan δ | G* (kPa) |
|---------------------------|----------|-----------|-------|----------|
| 100                       | 10.8     | 33        | 3.06  | 34.7     |
| 500                       | 21.1     | 30.8      | 1.53  | 38.8     |

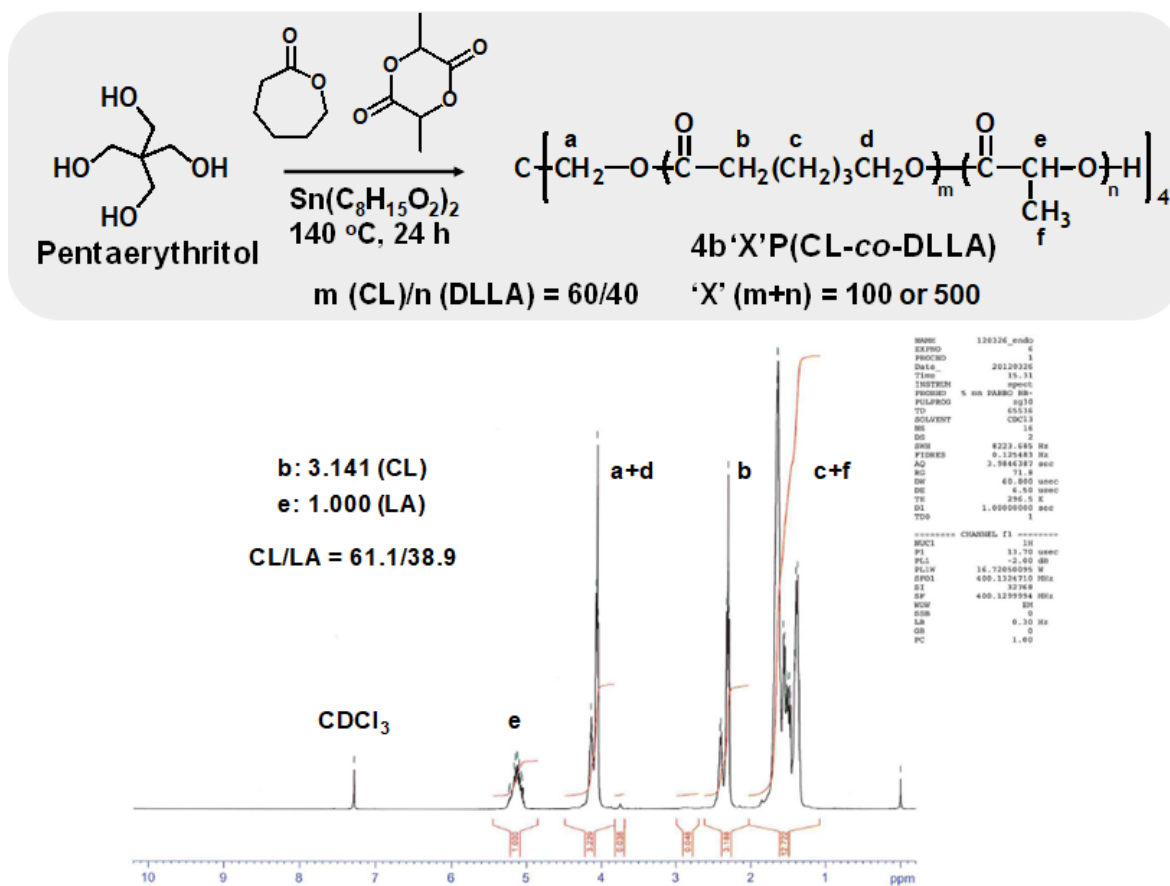

**Figure S1.** Synthesis of four branched P(CL-co-DLLA) with 60/40 CL/DLLA composition and  $^1\text{H}$  NMR of synthesized P(CL-co-DLLA) in CDCl<sub>3</sub>.

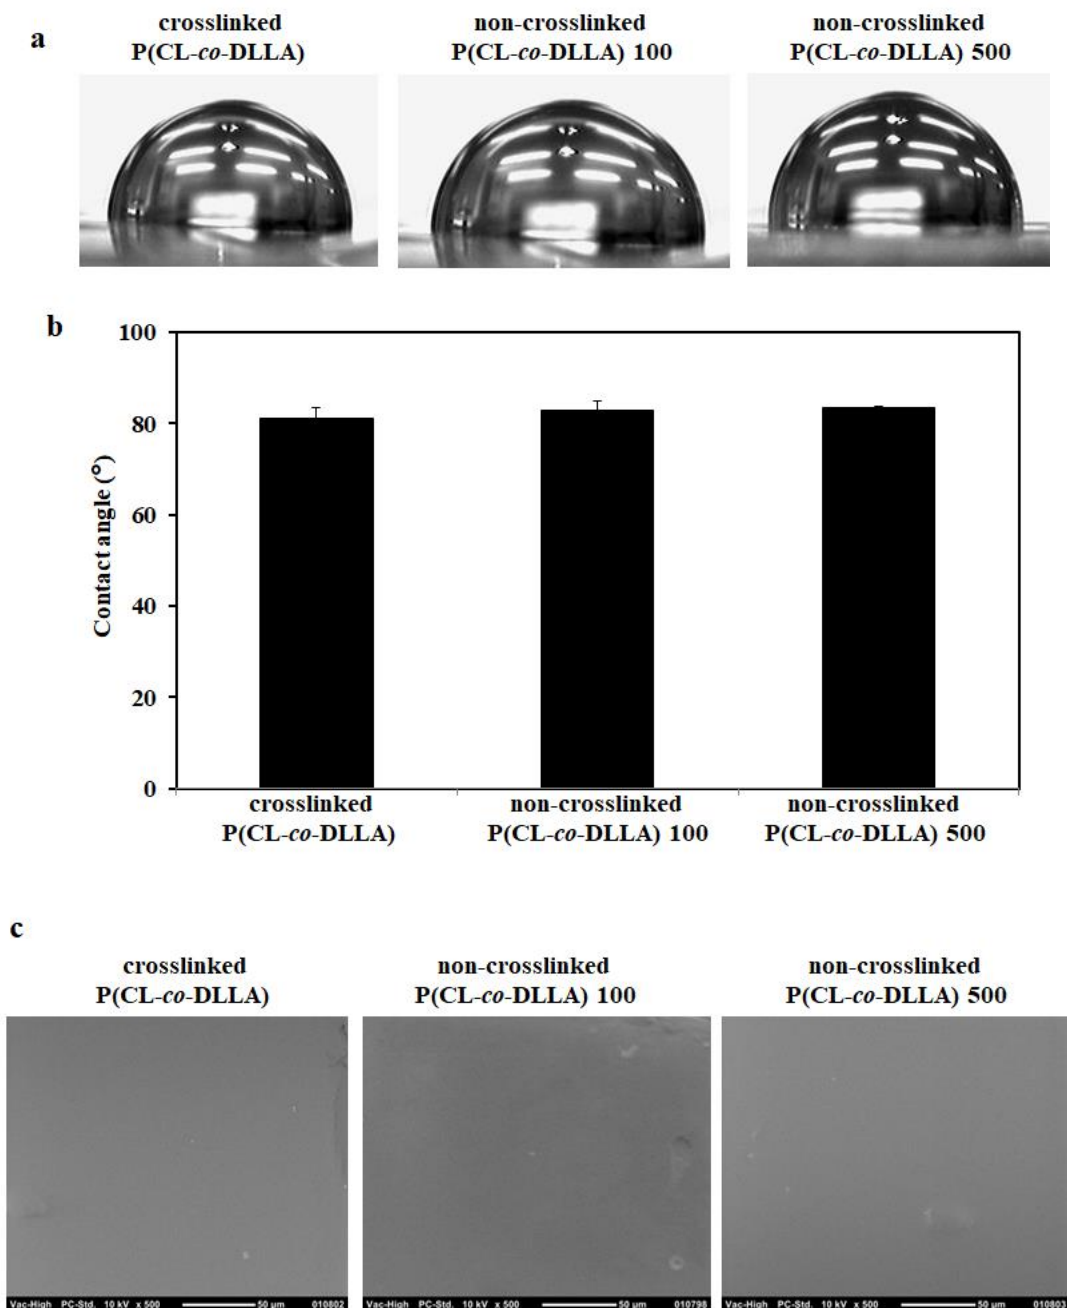

**Figure S2.** Water contact angle for crosslinked and non-crosslinked P(CL-co-DLLA) substrates. (a) The wettability of the substrates was measured by contact angle of meter. (b) Graphical representation of contact angle of crosslinked and non-crosslinked P(CL-co-DLLA) substrates. Each bar represents mean  $\pm$  SD, where  $n=3$  per sample and five different areas where measures for each sample. (c) Scanning electron microscope (SEM) images of crosslinked and non-crosslinked P(CL-co-DLLA) substrates (scale bars 50  $\mu$ m).

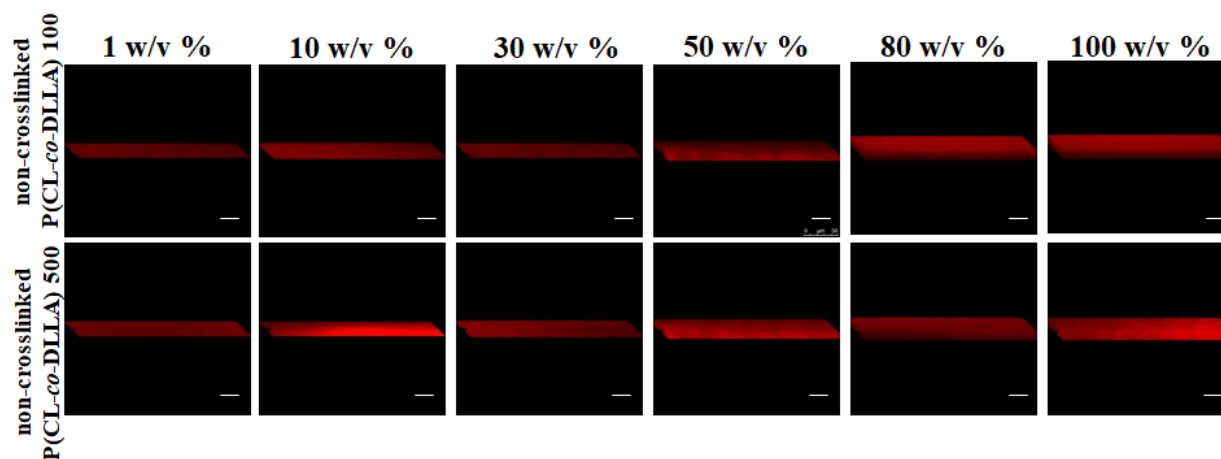

**Figure S3.** Thickness of spin coated non-crosslinked P(CL-co-DLLA) 100 (top images) and 500 (bottom images) substrates at different concentrations (scale bars 50 $\mu$ m).

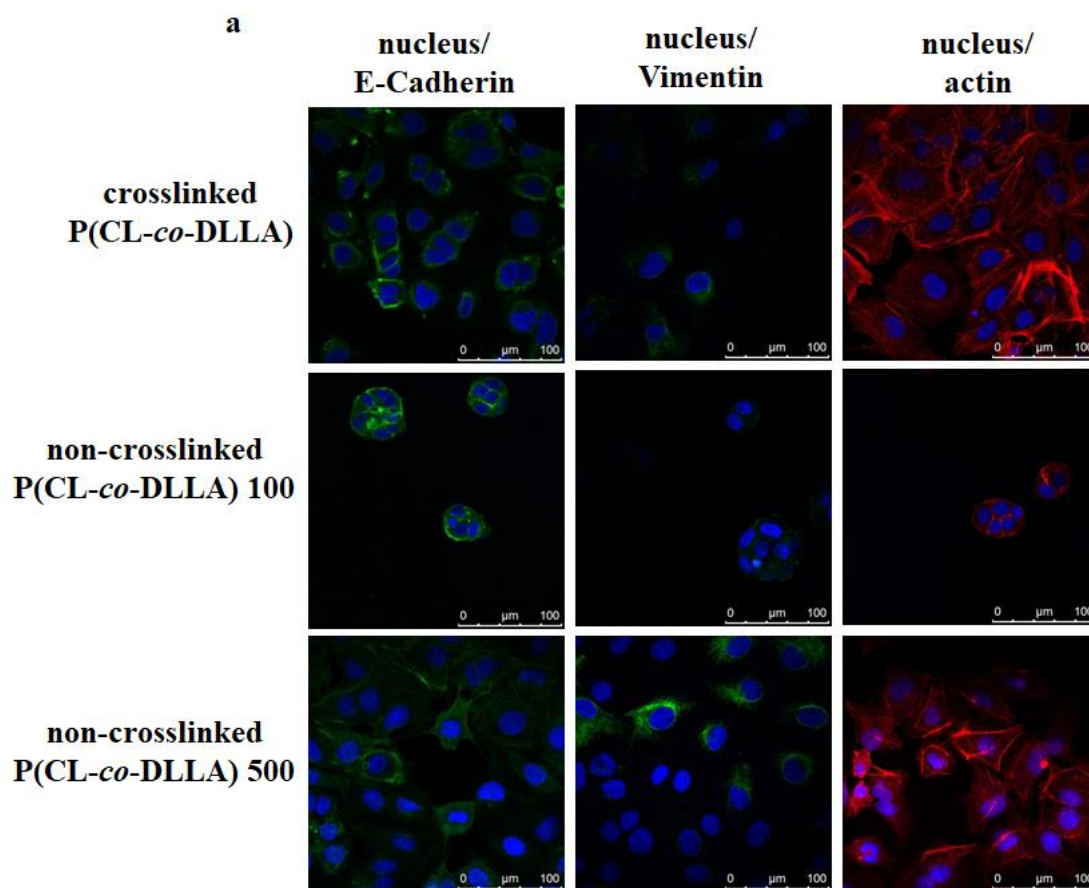

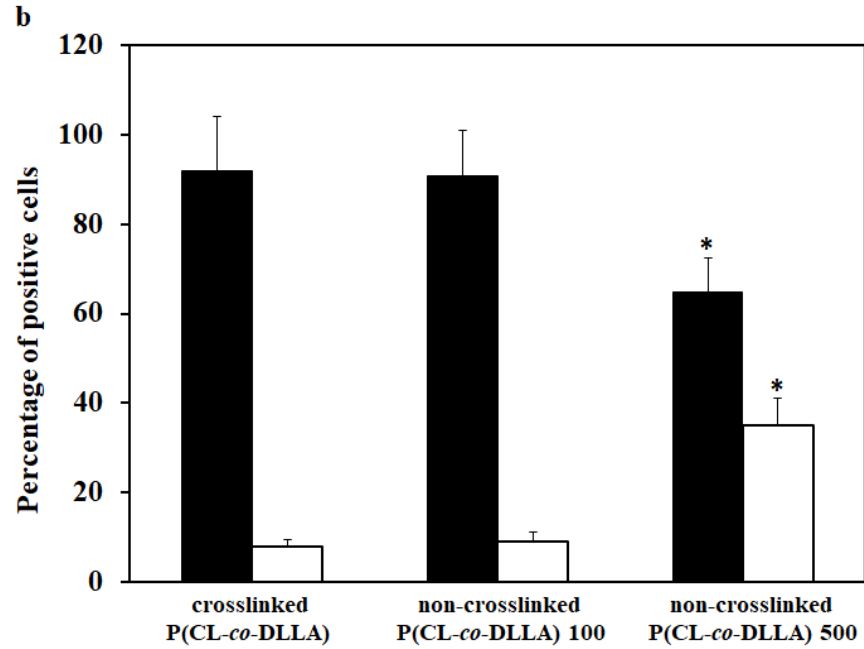

**Figure S4.** Biochemical evaluation of epithelial (E-cadherin) and mesenchymal (vimentin) markers in MCF 7 cells cultured on crosslinked or non-crosslinked P(CL-co-DLLA) 100 and 500 substrates. The images represent the expression of E-Cadherin and Vimentin in MCF 7 cells at 24 h. (a) Confocal microscopic images and (b) Percentage of E-cadherin and vimentin positive cells. Each bar represents mean  $\pm$  SD, where  $n=3$ ,  $*p=0.05$  for non-crosslinked P(CL-co-DLLA) substrate corresponding to crosslinked P(CL-co-DLLA) substrate of the same experiment.

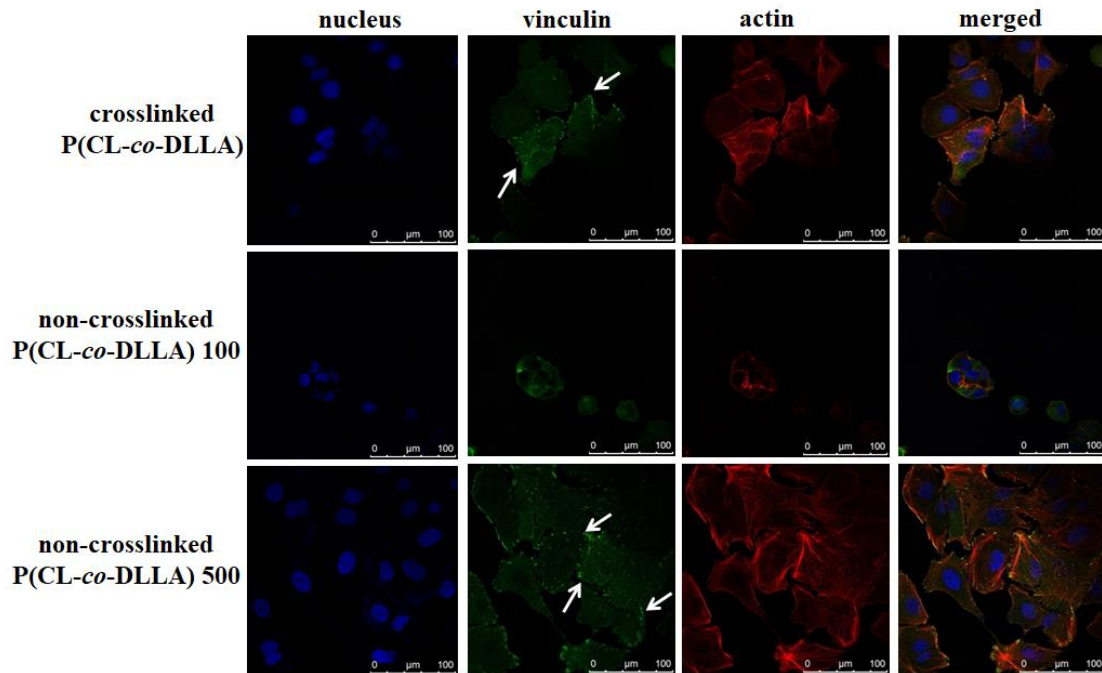

**Figure S5.** Focal adhesion of MCF 7 cells on P(CL-*co*-DLLA) crosslinked (top images) and P(CL-*co*-DLLA) non-crosslinked 100 (middle images) or 500 (bottom images) substrates at 24 h. The white arrows indicated the focal adhesion protein vinculin.
